# Supplementary material
Source: HighWire-hosted journal article supplement (https://care.diabetesjournals.org/content/suppl/2006/04/27/29.5.1058)

### ***Figure Legends***

*Figure S1.* Mean insulin sensitivity according to Semi-quantitative seropositivity score in subjects seropositive for *Chlamydia pneumoniae* [upper panel, n=49, (n=5 in categories 0-2, n=31 in categories 3-4, and n=13 in categories 5-7))] and in subjects seropositive for enteroviruses [lower panel, n=23, (n=9 in categories 3-4, and n=14 in categories 5-7)].

*Figure S2.* Mean systolic blood pressure according to Semi-quantitative seropositivity score in all subjects [upper panel, n=124 (n=45 in categories 0-2, n=56 in categories 3-4, and n=23 in categories 5-7)] and linear association between systolic and diastolic blood pressure and Quantitative Seropositivity Index in subjects seropositive for *Chlamydia pneumoniae* (lower panels, n=49).

# Figure S1

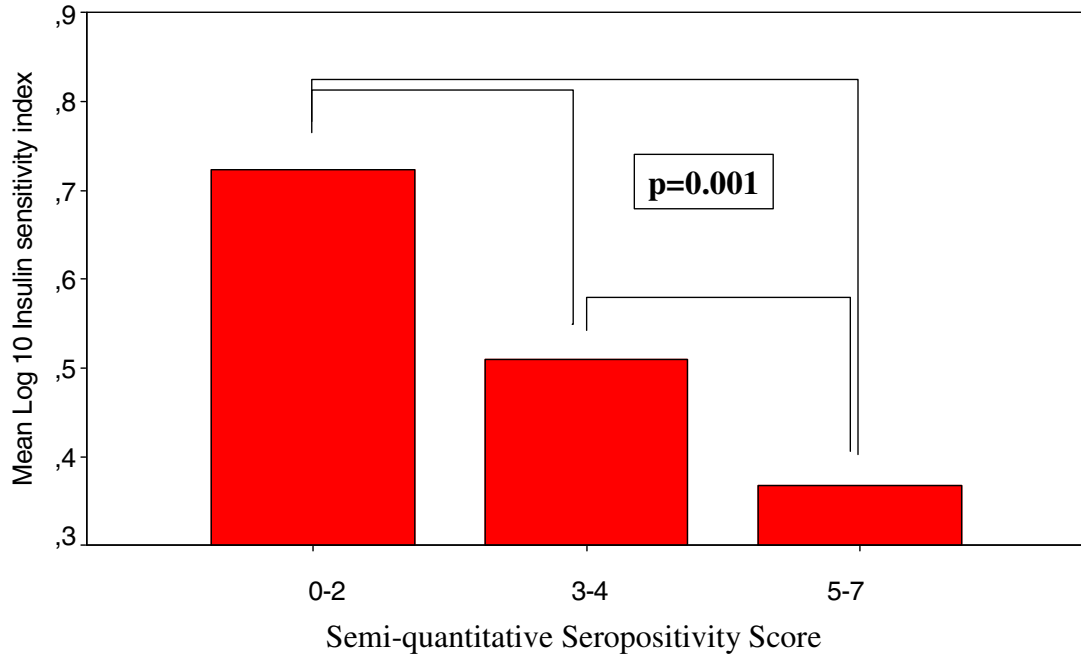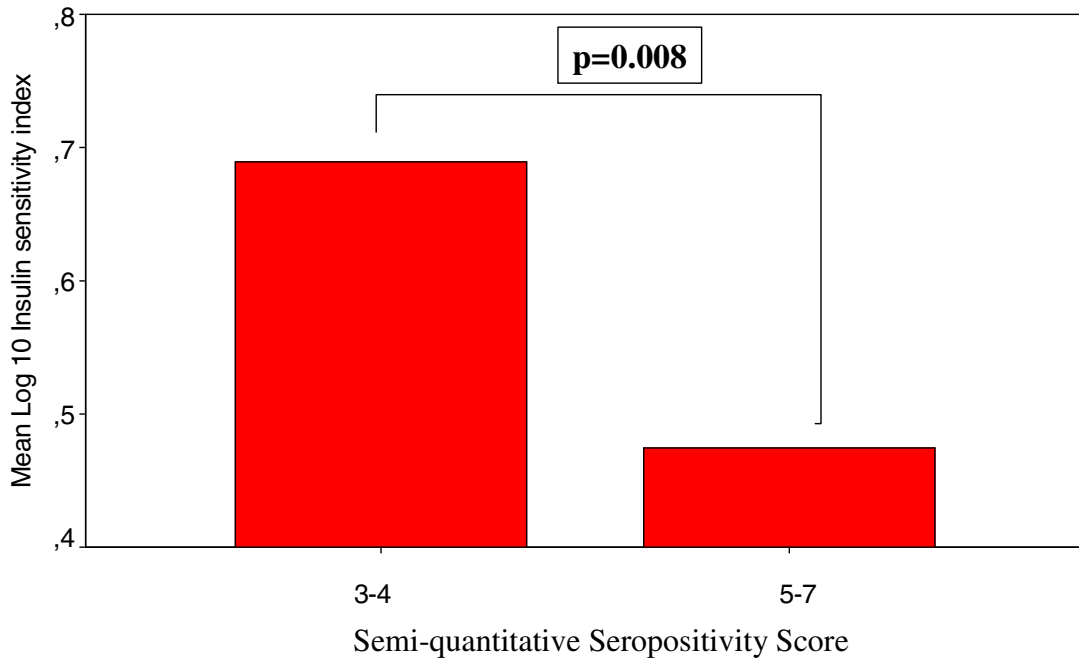

# Figure S2

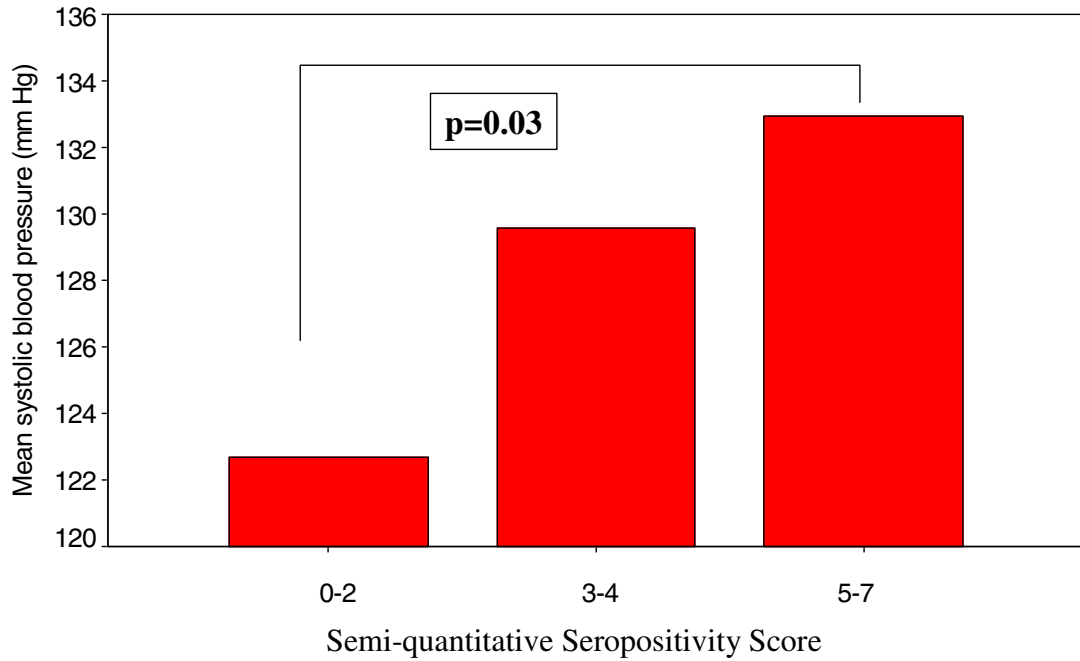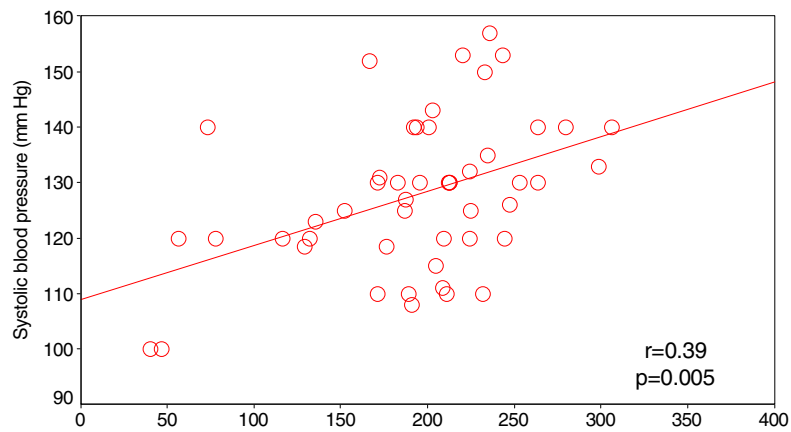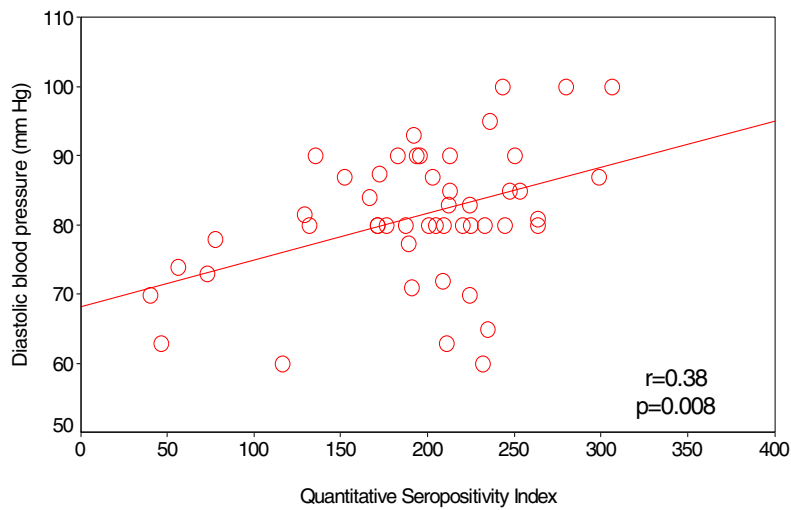

Supplement: dc2068OnlineAppendixFigures.pdf [file dc2068OnlineAppendixFigures.pdf]
