# Supplementary material
Source: HighWire-hosted journal article supplement (https://care.diabetesjournals.org/content/suppl/2006/04/27/29.5.1058)
Supplement: dc2068OnlineAppendixTable.pdf [file dc2068OnlineAppendixTable.pdf]

## Supplemental Table

*Linear association analysis among metabolic/vascular variables and pathogen seropositivities in the study subjects.*

| <i>Variable</i>          | <b>HSV-1<br/>Titer</b>         | <b>HSV-2<br/>Titer</b>           | <b>Chlamydia<br/>titer</b> | <b>Enterovirus<br/>titer</b>    | <b>Semi-<br/>quantitative<br/>score</b> | <b>Quantitative<br/>index</b>  |
|--------------------------|--------------------------------|----------------------------------|----------------------------|---------------------------------|-----------------------------------------|--------------------------------|
| Age                      | <b>r=0.18</b><br><b>p=0.04</b> | r=0.09<br>p=NS                   | r=-0.02<br>p=NS            | <b>r=-0.22</b><br><b>p=0.01</b> | r=0.11<br>p=NS                          | r=0.12<br>p=NS                 |
| Body mass index          | r=0.11<br>p=NS                 | <b>r=0.18</b><br><b>p=0.04</b>   | r=0.03<br>p=NS             | <i>r=0.15</i><br><i>p=0.07</i>  | r=0.009<br>p=NS                         | r=0.13<br>p=NS                 |
| Waist-to-hip ratio       | r=0.11<br>p=NS                 | r=0.09<br>p=NS                   | r=0.06<br>p=NS             | r=0.05<br>p=NS                  | r=0.03<br>p=NS                          | r=0.12<br>p=NS                 |
| Systolic blood pressure  | <b>r=0.14</b><br><b>p=0.1</b>  | r=0.03<br>p=NS                   | r=0.04<br>p=NS             | <b>r=0.24</b><br><b>p=0.009</b> | <i>r=0.16</i><br><i>p=0.06</i>          | <b>r=0.24</b><br><b>p=0.01</b> |
| Diastolic blood pressure | <b>r=0.20</b><br><b>p=0.03</b> | <i>r=0.15</i><br><i>p=0.07</i>   | r=0.01<br>p=NS             | <b>r=0.18</b><br><b>p=0.05</b>  | r=0.13<br>p=NS                          | <b>r=0.22</b><br><b>p=0.02</b> |
| Fasting glucose          | r=0.02<br>p=NS                 | <b>r=0.20</b><br><b>p=0.03</b>   | r=0.05<br>p=NS             | r=0.06<br>p=NS                  | r=0.04<br>p=NS                          | r=0.09<br>p=NS                 |
| HbA <sub>1c</sub>        | r=0.08<br>p=NS                 | r=0.09<br>p=NS                   | r=0.01<br>p=NS             | r=0.007<br>p=NS                 | r=0.06<br>p=NS                          | r=0.06<br>p=NS                 |
| Total cholesterol        | <i>r=0.16</i><br><i>p=0.06</i> | r=0.12<br>p=NS                   | r=0.009<br>p=NS            | r=0.14<br>p=NS                  | r=0.006<br>p=NS                         | r=0.08<br>p=NS                 |
| LDL-cholesterol          | r=0.08<br>p=NS                 | r=0.04<br>p=NS                   | r=0.01<br>p=NS             | r=0.07<br>p=NS                  | r=0.008<br>p=NS                         | r=0.12<br>p=NS                 |
| HDL-cholesterol          | r=-0.07<br>p=NS                | r=-0.01<br>p=NS                  | r=0.02<br>p=NS             | r=-0.04<br>p=NS                 | r=0.09<br>p=NS                          | r=0.11<br>p=NS                 |
| Triglycerides            | r=0.08<br>p=NS                 | r=0.05<br>p=NS                   | R=0.02<br>p=NS             | r=0.12<br>p=NS                  | r=0.02<br>p=NS                          | r=0.07<br>p=NS                 |
| C-reactive protein       | r=0.04<br>p=NS                 | r=0.04<br>p=NS                   | r=0.04<br>p=NS             | r=0.11<br>p=NS                  | r=0.06<br>p=NS                          | r=0.01<br>p=NS                 |
| sTNFR1                   | r=0.01<br>p=NS                 | <b>r=0.19</b><br><b>p=0.03</b>   | r=0.14<br>p=NS             | <b>r=0.19</b><br><b>p=0.03</b>  | r=0.09<br>p=NS                          | r=0.07<br>p=NS                 |
| sTNFR2                   | r=0.01<br>p=NS                 | r=0.05<br>p=NS                   | r=0.09<br>p=NS             | <b>r=0.19</b><br><b>p=0.03</b>  | r=0.12<br>p=NS                          | r=0.03<br>p=NS                 |
| Insulin sensitivity      | r=-0.05<br>p=NS                | <b>r=-0.29</b><br><b>p=0.002</b> | r=0.005<br>p=NS            | r=0.09<br>p=NS                  | r=0.03<br>p=NS                          | r=-0.13<br>p=NS                |
| Insulin secretion        | r=-0.05<br>p=NS                | r=-0.03<br>p=NS                  | r=-0.07<br>p=NS            | r=0.04<br>p=NS                  | r=0.05<br>p=0.NS                        | r=-0.06<br>p=NS                |
